# Supplementary material for: Regional, Geographic, and Racial/Ethnic Variation in Glycemic Control in a National Sample of Veterans With Diabetes
Source: PubMed Central journal article supplement — Diabetes Care. 2011 Mar 21;34(4):938–43. doi: 10.2337/dc10-1504 (PMC3064054; doi:10.2337/dc10-1504), 2011-03-21

SUPPLEMENTARY DATA

**Supplementary Table 1. Demographics of study cohort compared to those not using medication (i.e., column percent or mean)**

|                                              | All<br>(n=892223) | Prescribed Medication<br>(n=690968) | Not Prescribed Medication<br>(n=201255) |
|----------------------------------------------|-------------------|-------------------------------------|-----------------------------------------|
| Race/Ethnic Group*                           |                   |                                     |                                         |
| Non-Hispanic White                           | 61.51             | 72.86                               | 22.55                                   |
| Non-Hispanic Black                           | 12.14             | 12.85                               | 9.72                                    |
| Hispanic                                     | 13.86             | 5.11                                | 43.89                                   |
| Other Race                                   | 12.48             | 9.18                                | 23.81                                   |
| Urban Residence*                             | 61.64             | 61.13                               | 63.39                                   |
| Geographic Region*                           |                   |                                     |                                         |
| North East                                   | 10.52             | 11.17                               | 8.27                                    |
| South                                        | 29.75             | 30.00                               | 28.90                                   |
| West                                         | 15.30             | 14.88                               | 16.73                                   |
| Mid-Atlantic                                 | 22.53             | 22.57                               | 22.43                                   |
| Midwest                                      | 20.66             | 21.12                               | 19.10                                   |
| Age <sup>†, ‡</sup>                          | 66.20 (11.15)     | 65.80 (11.08)                       | 67.80 (11.24)                           |
| Male*                                        | 97.65             | 97.81                               | 97.10                                   |
| Service Connected Disability <sup>*, †</sup> | 12.30 (25.98)     | 12.30 (26.07)                       | 12.20 (25.26)                           |
| Married*                                     | 64.37             | 65.58                               | 60.21                                   |
| Hemoglobin A1c <sup>*, †</sup>               | 7.40 (1.44)       | 7.50 (1.45)                         | 6.90 (1.21)                             |
| HbA1c • 8%*                                  | 21.36             | 26.56                               | 3.53                                    |
| Comorbidities*                               |                   |                                     |                                         |
| Anemia                                       | 7.11              | 7.48                                | 5.85                                    |
| Cancer                                       | 7.58              | 7.60                                | 7.52                                    |
| Cerebrovascular Disease                      | 11.47             | 11.68                               | 10.75                                   |
| Congestive Heart Failure                     | 11.54             | 11.59                               | 11.35                                   |
| Cardiovascular Disease                       | 3.51              | 3.62                                | 3.14                                    |
| Electrolyte Disorders                        | 4.94              | 4.95                                | 4.90                                    |
| Hypertension                                 | 72.60             | 77.61                               | 55.39                                   |
| Hypothyroidism                               | 5.70              | 6.17                                | 4.06                                    |
| Liver Disease                                | 3.03              | 3.14                                | 2.67                                    |
| Lung Diseases                                | 13.62             | 13.88                               | 12.73                                   |
| Obesity                                      | 11.77             | 12.48                               | 9.36                                    |
| Other Diseases                               | 3.62              | 3.72                                | 3.28                                    |
| Peripheral Vascular Disease                  | 10.97             | 12.02                               | 7.39                                    |
| Substance Abuse                              | 3.58              | 3.79                                | 2.89                                    |
| Depression                                   | 10.99             | 12.42                               | 6.09                                    |
| Psychoses                                    | 4.03              | 4.31                                | 3.08                                    |
| Deceased*                                    | 20.83             | 24.65                               | 7.69                                    |

\*-Percentage

†-Years

‡-Mean and standard deviation (in parentheses)

**Supplementary Figure 1. Cohort Definition**

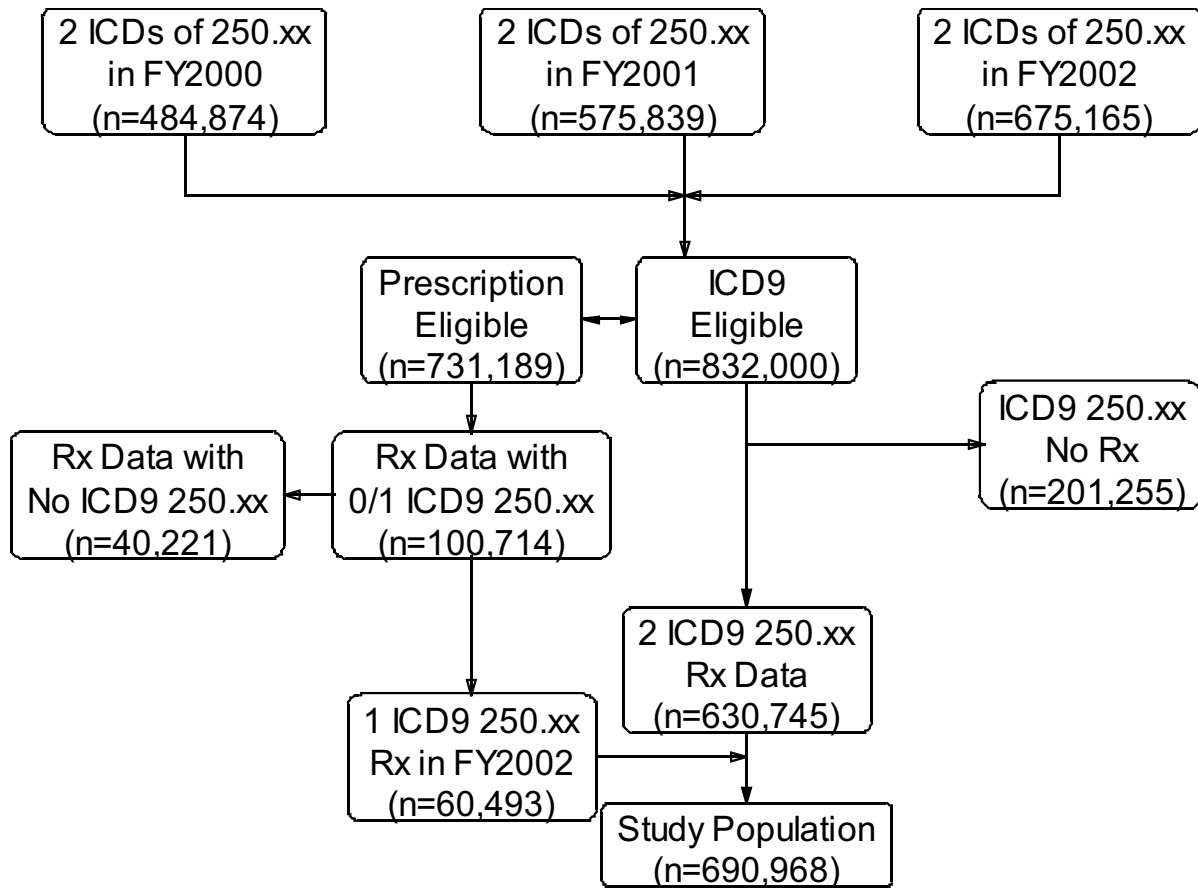

Supplement: supp_dc10-1504v101504_DC101504SupplementaryData.pdf [file supp_dc10-1504v101504_DC101504SupplementaryData.pdf]
